# Supplementary material for: Positionally-conserved but sequence-diverged: identification of long non-coding RNAs in the Brassicaceae and Cleomaceae
Source: PubMed Central journal article supplement (PMC4566204; doi:10.1186/s12870-015-0603-5), 2015-09-11

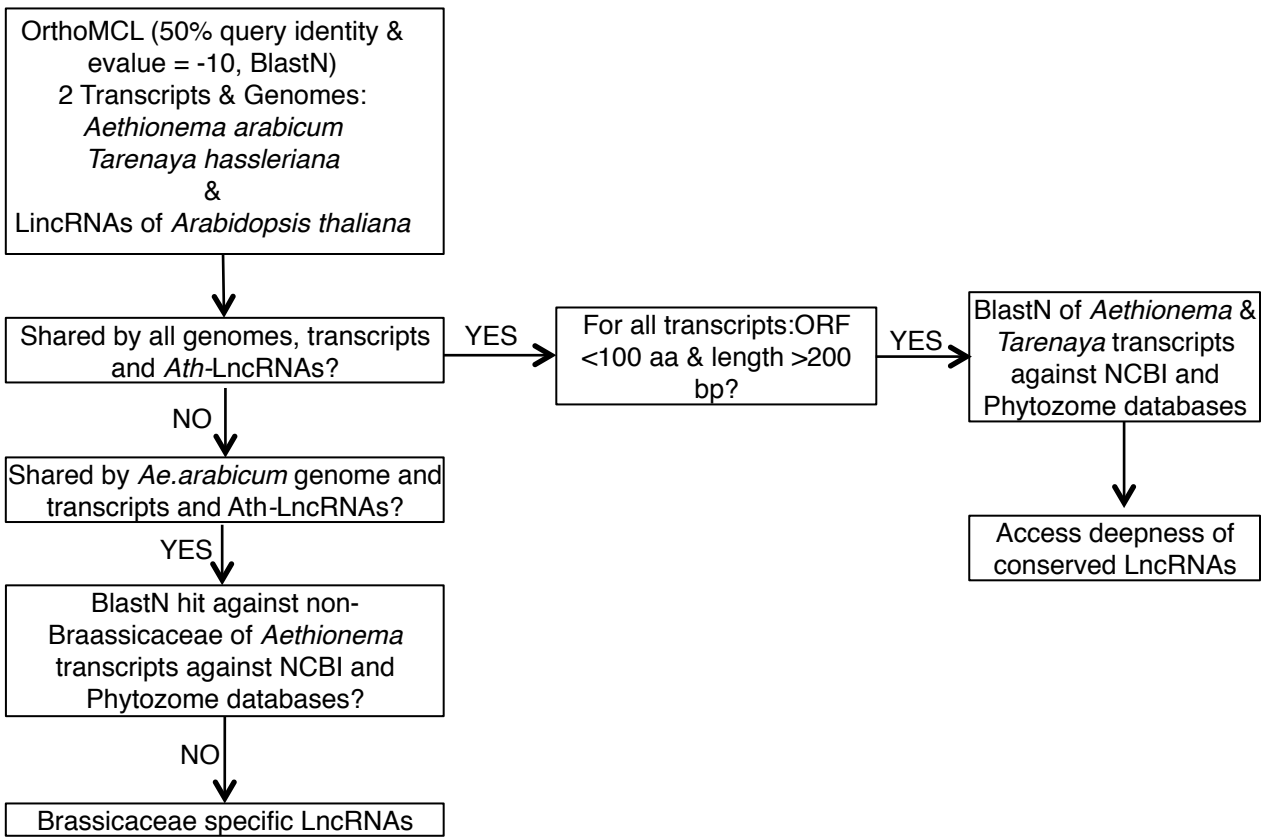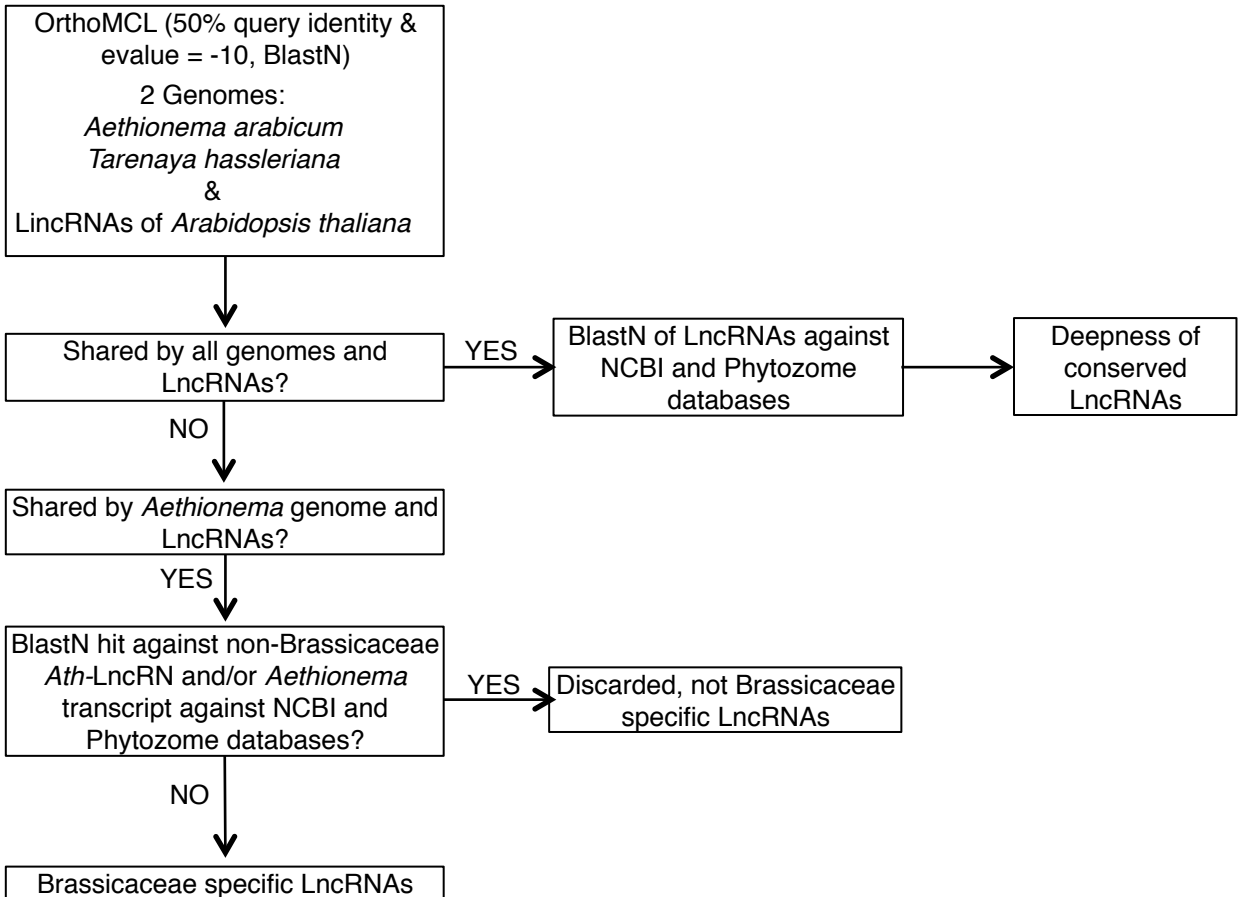

Supplement: 12870_2015_603_MOESM1_ESM.pdf [file 12870_2015_603_MOESM1_ESM.pdf]
