# Supplementary material for: Positionally-conserved but sequence-diverged: identification of long non-coding RNAs in the Brassicaceae and Cleomaceae
Source: PubMed Central journal article supplement (PMC4566204; doi:10.1186/s12870-015-0603-5), 2015-09-11

**A** *Arabidopsis thaliana*  
positionally conserved  
LncRNA  
At1NC070280  
MFE: -60.80 kcal/mol

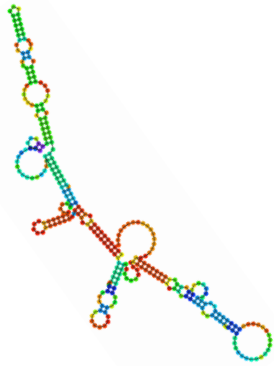

Aethionemeae LncRNA  
At1NC070280  
MFE: -10.34 kcal/mol

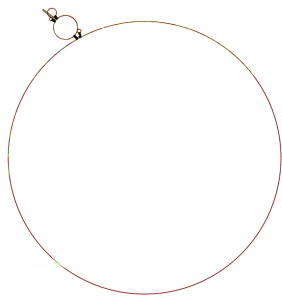

**B** *Arabidopsis thaliana*  
positionally  
conserved LncRNA  
At1NC099220  
MFE: -52.14

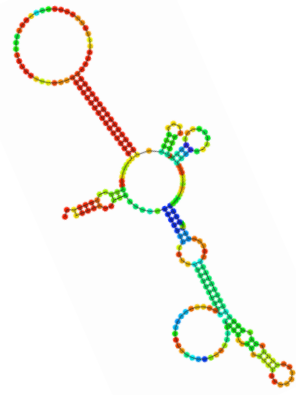

Aethionemeae LncRNA  
At1NC099220  
MFE: -30.76 kcal/mol

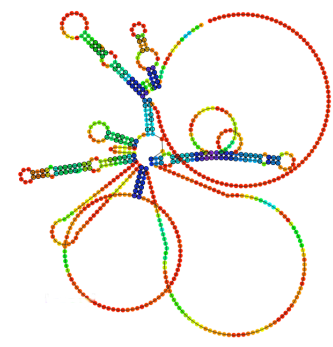

**C** *Arabidopsis thaliana*  
positionally conserved  
LncRNA  
Group1797  
MFE: -467.40 kcal/mol

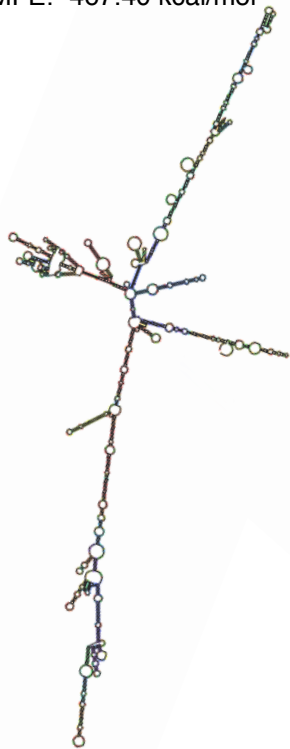

Aethionemeae  
LncRNA  
Group1797\_  
MFE: -27.38 kcal/mol

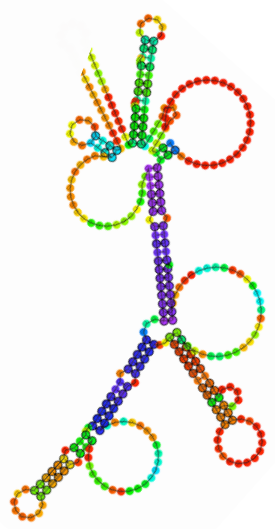

**D** *Arabidopsis thaliana*  
positionally conserved  
LncRNA  
Seed Group2679  
MFE: -281.20 kcal/mol

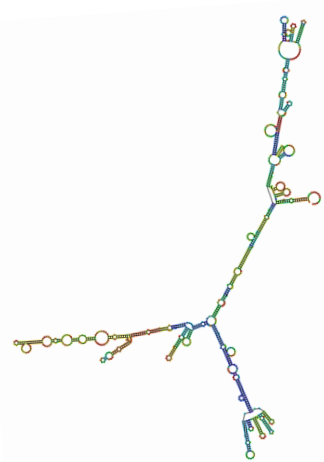

Cleomaceae  
LncRNA  
Seed Group2679  
MFE: -141.17 kcal/mol

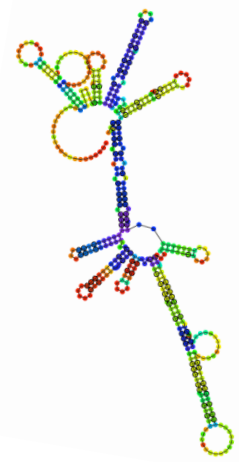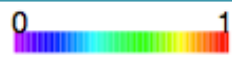

Supplement: 12870_2015_603_MOESM9_ESM.pdf [file 12870_2015_603_MOESM9_ESM.pdf]
